# Supplementary material for: Longitudinal trajectory and variability of skeletal muscle as predictors of prognosis after curative surgery for non-metastatic colorectal cancer
Source: Research Square preprint supplement (doi:10.21203/rs.3.rs-7613442/v1), 2025-10-24
Supplement: Supplementary file 1 [file 61000b99164e1681243233f8.docx]

**Appendix**

*The formulas utilized for the computation of SMI variability metrics are presented as follows:*

SDSMI =

CVSMI =

MMDSMI = MaxSMI – MinSMI

VIMSMI =

ARVSMI =

RMSESMI =

The meanSMI denotes the arithmetic average of SMI values.

The exponent x was modeled using the equation "SD = k × mean*x*" and determined through curve fitting via nonlinear regression analysis, implemented in R with the "vim package."

ŷi is the predicted value for the ith observation.

yi is the observed value for the ith observation.
