# Supplementary material for: Longitudinal trajectory and variability of skeletal muscle as predictors of prognosis after curative surgery for non-metastatic colorectal cancer
Source: Research Square preprint supplement (doi:10.21203/rs.3.rs-7613442/v1), 2025-10-24
Supplement: Supplementary file 2 [file 6c41a5ce745f62b9fba61ac3.docx]

**Supplementary materials**

**Table S1.** Comparison of demographic and clinical characteristics between included and excluded study participants.....................................................................................................................................[2]

**Table S2.** LCGMM analysis summary for datasets with ≧2 Measurements........................................ [3]

**Table S3.** LCGMM analysis summary for datasets with ≧3 Measurements.........................................[4]

**Table S4.** LCGMM analysis summary for datasets with ≧4 Measurements.........................................[5]

**Table S5.** Baseline characteristics of SMI trajectory groups for datasets with ≧3 Measurements.......[6]

**Table S6.** Baseline characteristics of SMI trajectory groups for datasets with ≧4 Measurements.......[7]

**Table S7.** The association between other SMI variability metrics and OS in CRC................................[8]

**Table S8.** The association between other SMI variability metrics and RFS in CRC..............................[9]

**Table S9.** Sensitivity analysis of the association between SMI trajectory groups and OS in CRC....[10]

**Table S10.** Sensitivity analysis of the association between SMI trajectory groups and RFS in CRC..[11]

**Table S11.** The association between SMI trajectory groups and OS in CRC among male..................[12]

**Table S12.** The association between SMI trajectory groups and RFS in CRC among male................[13]

**Table S13.** The association between SMI trajectory groups and OS in CRC among female.........[14]

**Table S14.** The association between SMI trajectory groups and RFS in CRC among female.......[15]

**Table S1.** Comparison of demographic and clinical characteristics between included and excluded study participants.

| Variables | Total (n=2560) | Included (n=1351) | Excluded (n=1209) | P value |
| --- | --- | --- | --- | --- |
| Age, years, M (IQR) | 60.0 (51.0, 68.0) | 59.0 (51.0, 66.0) | 61.0 (51.0, 69.0) | <0.001 |
| Sex, n (%) |  |  |  | 0.162 |
| Male | 1481 (57.9) | 799 (59.1) | 682 (56.4) |  |
| Female | 1079 (42.1) | 552 (40.9) | 527 (43.6) |  |
| BMI, Kg/m2, M (IQR) | 22.5 (20.8, 24.9) | 22.7 (20.8, 25.0) | 22.3 (20.6, 24.6) | 0.002 |
| Location, n (%) |  |  |  | 0.964 |
| Ascending colon | 359 (14.0) | 189 (14.0) | 170 (14.1) |  |
| Transverse colon | 235 (9.2) | 126 (9.3) | 109 (9.0) |  |
| Others | 1966 (76.8) | 1036 (76.7) | 930 (76.9) |  |
| Type, n (%) |  |  |  | 0.001 |
| Adenocarcinoma | 2397 (93.6) | 1245 (92.2) | 1152 (95.3) |  |
| Other | 163 (6.4) | 106 (7.8) | 57 (4.7) |  |
| Differentiation, n (%) |  |  |  | <0.001 |
| High and middle | 1635 (63.9) | 917 (67.9) | 718 (59.4) |  |
| Poorly and undifferentiated | 707 (27.6) | 333 (24.6) | 374 (30.9) |  |
| Unknow | 218 (8.5) | 101 (7.5) | 117 (9.7) |  |
| Stage, n (%) |  |  |  | 0.084 |
| Ⅰ | 602 (23.5) | 308 (22.8) | 294 (24.3) |  |
| Ⅱ | 1009 (39.4) | 515 (38.1) | 494 (40.9) |  |
| Ⅲ | 949 (37.1) | 528 (39.1) | 421 (34.8) |  |
| CEA, ng/ml, M (IQR) | 3.8 (2.1, 8.7) | 3.9 (2.2, 8.4) | 3.7 (2.1, 9.0) | 0.734 |
| CA19-9, U/ml, M (IQR) | 12.8 (7.5, 23.0) | 12.7 (7.6, 22.3) | 13.1 (7.5, 24.0) | 0.596 |
| CA12-5, U/ml, M (IQR) | 12.9 (9.2, 18.1) | 12.7 (9.0, 17.7) | 13.2 (9.6, 18.7) | 0.004 |
| Vascular invasion, n (%) |  |  |  | 0.662 |
| NO | 383 (15.0) | 194 (14.4) | 189 (15.6) |  |
| Yes | 198 (7.7) | 106 (7.8) | 92 (7.6) |  |
| Unknow | 1979 (77.3) | 1051 (77.8) | 928 (76.8) |  |
| Chemotherapy, n (%) |  |  |  | <0.001 |
| NO | 1110 (43.4) | 469 (34.7) | 641 (53.0) |  |
| Yes | 1450 (56.6) | 882 (65.3) | 568 (47.0) |  |
| Radiotherapy, n (%) |  |  |  | 0.402 |
| NO | 2523 (98.6) | 1334 (98.7) | 1189 (98.3) |  |
| Yes | 37 (1.4) | 17 (1.3) | 20 (1.7) |  |

Note: BMI, body mass index; CA12-5, carbohydrate antigen12-5; CA19-9, carbohydrate antigen 19-9; CEA, carcinoembryonic antigen; CRC, colorectal cancer.

**Table S2.** LCGMM analysis summary for datasets with ≧2 Measurements.

| Models | Group numbers | Loglik | BIC | Sample size of each group (%) | Mean posterior probabilities | Posterior probabilities >70% (%) |
| --- | --- | --- | --- | --- | --- | --- |
| Linear | 1 | -15082.38 | 30200.80 | 100 | NA | NA |
| Quadratic | 1 | -15082.23 | 30214.92 | 100 | NA | NA |
| Cubic | 1 | -15052.19 | 30169.26 | 100 | NA | NA |
| Linear | 2 | -15072.45 | 30202.57 | 36.05 / 63.95 | 0.75 / 0.83 | 56.88 / 80.79 |
| Quadratic | 2 | -15013.53 | 30106.36 | 96.45 / 3.55 | 0.97 / 0.8 | 97.93 / 66.67 |
| Cubic | 2 | -14951.50 | 30003.92 | 4.66 / 95.34 | 0.83 / 0.97 | 77.78 / 97.67 |
| Linear | 3 | -15037.08 | 30153.46 | 38.05 / 1.55 / 60.4 | 0.76 / 0.81 / 0.82 | 61.09 / 71.43 / 76.72 |
| Quadratic | 3 | -14987.78 | 30083.68 | 10.44 / 86.9 / 2.66 | 0.7 / 0.85 / 0.84 | 42.55 / 86.29 / 77.78 |
| Cubic | 3 | -14914.10 | 29965.17 | 4 / 4.74 / 91.27 | 0.82 / 0.73 / 0.92 | 68.52 / 53.12 / 93.84 |
| Linear | 4 | -15037.08 | 30175.09 | 42.26 / 1.7 / 56.03 / 0 | 0.73 / 0.78 / 0.63 / 0 | 54.99 / 65.22 / 31.04 / NA |
| Quadratic | 4 | -14972.21 | 30081.38 | 1.04 / 35.6 / 3.55 / 59.81 | 0.77 / 0.73 / 0.78 / 0.79 | 64.29 / 54.68 / 70.83 / 72.52 |
| Cubic | 4 | -14896.51 | 29966.03 | 3.7 / 10.81 / 19.17 / 66.32 | 0.79 / 0.68 / 0.67 / 0.79 | 66 / 44.52 / 39.77 / 70.54 |
| Linear | 5 | -15020.48 | 30163.51 | 4.96 / 3.55 / 45.08 / 1.7 / 44.71 | 0.67 / 0.7 / 0.78 / 0.82 / 0.62 | 43.28 / 45.83 / 65.02 / 69.57 / 23.68 |
| Quadratic | 5 | -14956.90 | 30079.59 | 0.96 / 4.22 / 56.55 / 0.89 / 37.38 | 0.78 / 0.7 / 0.79 / 0.83 / 0.73 | 61.54 / 49.12 / 73.82 / 91.67 / 56.83 |
| Cubic | 5 | -14846.10 | 29901.26 | 0.15 / 6.07 / 1.78 / 88.82 / 3.18 | 0.99 / 0.72 / 0.8 / 0.9 / 0.78 | 100 / 51.22 / 62.5 / 90.92 / 62.79 |

Note: BIC, bayesian information criterion.

**Table S3.** LCGMM analysis summary for datasets with ≧3 Measurements.

| Models | Group numbers | Loglik | BIC | Sample size of each group (%) | Mean posterior probabilities | Posterior probabilities >70% (%) |
| --- | --- | --- | --- | --- | --- | --- |
| Linear | 1 | -12799.97 | 25634.38 | 100 | NA | NA |
| Quadratic | 1 | -12799.31 | 25646.84 | 100 | NA | NA |
| Cubic | 1 | -12770.89 | 25603.76 | 100 | NA | NA |
| Linear | 2 | -12791.67 | 25638.43 | 38.27 / 61.73 | 0.75 / 0.83 | 58.67 / 81.16 |
| Quadratic | 2 | -12733.39 | 25542.55 | 94.8 / 5.2 | 0.97 / 0.8 | 97.52 / 70.59 |
| Cubic | 2 | -12671.79 | 25440.00 | 5.82 / 94.18 | 0.85 / 0.97 | 85.96 / 97.72 |
| Linear | 3 | -12761.99 | 25599.75 | 40.31 / 2.14 / 57.55 | 0.77 / 0.8 / 0.82 | 64.05 / 71.43 / 76.77 |
| Quadratic | 3 | -12709.50 | 25522.32 | 17.04 / 79.49 / 3.47 | 0.7 / 0.85 / 0.84 | 44.91 / 84.47 / 79.41 |
| Cubic | 3 | -12635.32 | 25401.51 | 4.69 / 6.33 / 88.98 | 0.84 / 0.73 / 0.92 | 73.91 / 53.23 / 92.89 |
| Linear | 4 | -12761.99 | 25620.41 | 44.39 / 2.14 / 53.47 / 0 | 0.74 / 0.8 / 0.61 / 0 | 58.16 / 71.43 / 15.65 / NA |
| Quadratic | 4 | -12693.19 | 25517.25 | 1.02 / 39.49 / 54.39 / 5.1 | 0.84 / 0.75 / 0.8 / 0.76 | 70 / 62.27 / 75.8 / 62 |
| Cubic | 4 | -12617.40 | 25400.10 | 4.49 / 13.37 / 20.31 / 61.84 | 0.81 / 0.7 / 0.7 / 0.81 | 70.45 / 51.15 / 48.74 / 73.76 |
| Linear | 5 | -12744.79 | 25606.66 | 4.69 / 4.8 / 39.9 / 2.45 / 48.16 | 0.67 / 0.69 / 0.63 / 0.82 / 0.79 | 50 / 44.68 / 26.34 / 75 / 72.25 |
| Quadratic | 5 | -12682.06 | 25522.53 | 1.02 / 5.71 / 40.61 / 0.82 / 51.84 | 0.82 / 0.69 / 0.76 / 0.88 / 0.81 | 70 / 48.21 / 64.07 / 87.5 / 75.59 |
| Cubic | 5 | -12572.36 | 25344.47 | 0.1 / 7.55 / 2.04 / 86.02 / 4.29 | 1 / 0.73 / 0.84 / 0.9 / 0.8 | 100 / 52.7 / 70 / 90.15 / 66.67 |

Note: BIC, bayesian information criterion.

**Table S4.** LCGMM analysis summary for datasets with ≧4 Measurements.

| Models | Group numbers | Loglik | BIC | Sample size of each group (%) | Mean posterior probabilities | Posterior probabilities >70% (%) |
| --- | --- | --- | --- | --- | --- | --- |
| Linear | 1 | -10624.27 | 21281.51 | 100 | NA | NA |
| Quadratic | 1 | -10623.88 | 21293.90 | 100 | NA | NA |
| Cubic | 1 | -10597.61 | 21254.55 | 100 | NA | NA |
| Linear | 2 | -10617.08 | 21286.88 | 40.19 / 59.81 | 0.76 / 0.83 | 59.04 / 80.28 |
| Quadratic | 2 | -10565.55 | 21203.61 | 94.24 / 5.76 | 0.97 / 0.82 | 97.82 / 71.43 |
| Cubic | 2 | -10508.28 | 21108.84 | 6.17 / 93.83 | 0.86 / 0.98 | 88.89 / 98.54 |
| Linear | 3 | -10591.63 | 21255.76 | 41.7 / 2.47 / 55.83 | 0.78 / 0.82 / 0.82 | 67.43 / 77.78 / 78.38 |
| Quadratic | 3 | -10541.63 | 21182.14 | 1.37 / 93.14 / 5.49 | 0.88 / 0.97 / 0.82 | 80 / 97.5 / 75 |
| Cubic | 3 | -10469.82 | 21064.88 | 4.94 / 8.37 / 86.69 | 0.85 / 0.75 / 0.92 | 83.33 / 62.3 / 91.77 |
| Linear | 4 | -10581.92 | 21256.12 | 12.48 / 22.36 / 61.87 / 3.29 | 0.63 / 0.72 / 0.82 / 0.8 | 29.67 / 48.47 / 74.5 / 66.67 |
| Quadratic | 4 | -10526.75 | 21178.73 | 1.37 / 41.98 / 51.44 / 5.21 | 0.85 / 0.78 / 0.8 / 0.78 | 70 / 68.3 / 76 / 68.42 |
| Cubic | 4 | -10437.09 | 21032.37 | 1.78 / 8.37 / 85.6 / 4.25 | 0.9 / 0.76 / 0.91 / 0.84 | 92.31 / 62.3 / 91.19 / 77.42 |
| Linear | 5 | -10577.19 | 21266.43 | 3.84 / 5.08 / 38.55 / 49.38 / 3.16 | 0.69 / 0.71 / 0.65 / 0.81 / 0.81 | 50 / 54.05 / 36.3 / 74.17 / 69.57 |
| Quadratic | 5 | -10506.72 | 21165.04 | 1.37 / 1.65 / 3.98 / 42.39 / 50.62 | 0.85 / 0.77 / 0.82 / 0.77 / 0.78 | 70 / 58.33 / 72.41 / 69.26 / 70.46 |
| Cubic | 5 | -10408.20 | 21007.55 | 0.14 / 9.33 / 2.19 / 84.09 / 4.25 | 1 / 0.76 / 0.88 / 0.91 / 0.86 | 100 / 61.76 / 81.25 / 91.52 / 83.87 |

Note: BIC, bayesian information criterion.

**Table S5.** Baseline characteristics of SMI trajectory groups for datasets with ≧3 Measurements.

| Variable | Total (n=980) | SMI trajectory | | | *P value* |
| --- | --- | --- | --- | --- | --- |
| Stable state (n=872) | Declining fluctuations (n=46) | Stable increasing (n=62) |
| Age, years, M (IQR) | 59.0 (50.0, 65.0) | 58.0 (50.0, 65.0) | 59.5 (51.0, 64.0) | 60.0 (54.0, 68.0) | 0.391 |
| Sex, n(%) |  |  |  |  | <0.001 |
| Male | 594 (60.6) | 507 (58.1) | 38 (82.6) | 49 (79.0) |  |
| Female | 386 (39.4) | 365 (41.9) | 8 (17.4) | 13 (21.0) |  |
| BMI, Kg/m2, M (IQR) | 22.8 (20.8, 25.3) | 22.7 (20.8, 25.2) | 24.2 (21.6, 25.9) | 22.9 (20.6, 25.4) | 0.130 |
| Location, n (%) |  |  |  |  | 0.001 |
| Ascending colon | 136 (13.9) | 116 (13.3) | 5 (10.9) | 15 (24.2) |  |
| Transverse colon | 99 (10.1) | 85 (9.7) | 1 (2.2) | 13 (21.0) |  |
| Others | 745 (76.0) | 671 (76.9) | 40 (87.0) | 34 (54.8) |  |
| Type, n (%) |  |  |  |  | 0.254 |
| Adenocarcinoma | 892 (91.0) | 796 (91.3) | 43 (93.5) | 53 (85.5) |  |
| Other | 88 (9.0) | 76 (8.7) | 3 (6.5) | 9 (14.5) |  |
| Differentiation, n (%) |  |  |  |  | 0.223 |
| High and middle | 676 (69.0) | 602 (69.0) | 37 (80.4) | 37 (59.7) |  |
| Poorly and undifferentiated | 243 (24.8) | 217 (24.9) | 7 (15.2) | 19 (30.6) |  |
| Unknow | 61 (6.2) | 53 (6.1) | 2 (4.3) | 6 (9.7) |  |
| Stage, n (%) |  |  |  |  | 0.022 |
| Ⅰ | 181 (18.5) | 170 (19.5) | 5 (10.9) | 6 (9.7) |  |
| Ⅱ | 405 (41.3) | 354 (40.6) | 16 (34.8) | 35 (56.5) |  |
| Ⅲ | 394 (40.2) | 348 (39.9) | 25 (54.3) | 21 (33.9) |  |
| CEA, ng/ml, M (IQR) | 3.9 (2.2, 8.8) | 3.9 (2.2, 8.5) | 3.8 (2.5, 6.6) | 4.8 (2.8, 14.2) | 0.130 |
| CA19-9, U/ml, M (IQR) | 12.4 (7.4, 22.4) | 12.4 (7.5, 22.4) | 13.4 (8.6, 22.0) | 11.7 (6.4, 23.6) | 0.705 |
| CA12-5, U/ml, M (IQR) | 12.7 (9.0, 17.4) | 12.8 (9.1, 17.5) | 12.4 (7.8, 17.2) | 11.1 (8.2, 17.9) | 0.633 |
| Vascular invasion, n (%) |  |  |  |  | 0.045 |
| NO | 131 (13.4) | 111 (12.7) | 5 (10.9) | 15 (24.2) |  |
| Yes | 87 (8.9) | 81 (9.3) | 1 (2.2) | 5 (8.1) |  |
| Unknow | 762 (77.8) | 680 (78.0) | 40 (87.0) | 42 (67.7) |  |
| Chemotherapy, n (%) |  |  |  |  | 0.062 |
| NO | 244 (24.9) | 227 (26.0) | 8 (17.4) | 9 (14.5) |  |
| Yes | 736 (75.1) | 645 (74.0) | 38 (82.6) | 53 (85.5) |  |
| Radiotherapy, n (%) |  |  |  |  | 0.576 |
| NO | 966 (98.6) | 859 (98.5) | 45 (97.8) | 62 (100.0) |  |
| Yes | 14 (1.4) | 13 (1.5) | 1 (2.2) | 0 (0.0) |  |

Note: BMI, body mass index; CA12-5, carbohydrate antigen12-5; CA19-9, carbohydrate antigen 19-9; CEA, carcinoembryonic antigen; CRC, colorectal cancer; SMI, skeletal muscle index.

**Table S6.** Baseline characteristics of SMI trajectory groups for datasets with ≧4 Measurements.

| Variable | Total (n=729) | SMI trajectory | | | *P value* |
| --- | --- | --- | --- | --- | --- |
| Stable state (n=632) | Declining fluctuations (n=36) | Stable increasing (n=61) |
| Age, years, M (IQR) | 58.0 (50.0, 65.0) | 58.0 (50.0, 65.0) | 59.0 (51.0, 63.0) | 59.0 (52.0, 64.0) | 0.909 |
| Sex, n (%) |  |  |  |  | <0.001 |
| Male | 450 (61.7) | 370 (58.5) | 32 (88.9) | 48 (78.7) |  |
| Female | 279 (38.3) | 262 (41.5) | 4 (11.1) | 13 (21.3) |  |
| BMI, Kg/m2, M (IQR) | 22.8 (20.8, 25.4) | 22.7 (20.8, 25.3) | 23.9 (21.5, 25.9) | 23.4 (20.8, 25.4) | 0.534 |
| Location, n (%) |  |  |  |  | 0.005 |
| Ascending colon | 109 (15.0) | 88 (13.9) | 4 (11.1) | 17 (27.9) |  |
| Transverse colon | 80 (11.0) | 69 (10.9) | 1 (2.8) | 10 (16.4) |  |
| Others | 540 (74.1) | 475 (75.2) | 31 (86.1) | 34 (55.7) |  |
| Type, n (%) |  |  |  |  | 0.378 |
| Adenocarcinoma | 658 (90.3) | 573 (90.7) | 33 (91.7) | 52 (85.2) |  |
| Other | 71 (9.7) | 59 (9.3) | 3 (8.3) | 9 (14.8) |  |
| Differentiation, n (%) |  |  |  |  | 0.489 |
| High and middle | 495 (67.9) | 428 (67.7) | 28 (77.8) | 39 (63.9) |  |
| Poorly and undifferentiated | 190 (26.1) | 167 (26.4) | 7 (19.4) | 16 (26.2) |  |
| Unknow | 44 (6.0) | 37 (5.9) | 1 (2.8) | 6 (9.8) |  |
| Stage, n (%) |  |  |  |  | 0.529 |
| Ⅰ | 92 (12.6) | 83 (13.1) | 3 (8.3) | 6 (9.8) |  |
| Ⅱ | 307 (42.1) | 264 (41.8) | 13 (36.1) | 30 (49.2) |  |
| Ⅲ | 330 (45.3) | 285 (45.1) | 20 (55.6) | 25 (41.0) |  |
| CEA, ng/ml, M (IQR) | 3.9 (2.3, 8.8) | 3.9 (2.2, 8.7) | 3.7 (2.4, 6.8) | 5.1 (2.8, 11.3) | 0.160 |
| CA19-9, U/ml, M (IQR) | 12.7 (7.5, 22.6) | 12.8 (7.7, 22.6) | 12.2 (8.3, 22.5) | 11.5 (6.0, 23.6) | 0.531 |
| CA12-5, U/ml, M (IQR) | 12.8 (9.0, 17.4) | 12.8 (9.1, 17.5) | 12.0 (7.5, 17.2) | 12.8 (9.3, 17.9) | 0.608 |
| Vascular invasion, n (%) |  |  |  |  | 0.020 |
| NO | 94 (12.9) | 75 (11.9) | 4 (11.1) | 15 (24.6) |  |
| Yes | 76 (10.4) | 67 (10.6) | 1 (2.8) | 8 (13.1) |  |
| Unknow | 559 (76.7) | 490 (77.5) | 31 (86.1) | 38 (62.3) |  |
| Chemotherapy, n (%) |  |  |  |  | 0.233 |
| NO | 125 (17.1) | 114 (18.0) | 5 (13.9) | 6 (9.8) |  |
| Yes | 604 (82.9) | 518 (82.0) | 31 (86.1) | 55 (90.2) |  |
| Radiotherapy, n (%) |  |  |  |  | 0.459 |
| NO | 719 (98.6) | 622 (98.4) | 36 (100.0) | 61 (100.0) |  |
| Yes | 10 (1.4) | 10 (1.6) | 0 (0.0) | 0 (0.0) |  |

Note: BMI, body mass index; CA12-5, carbohydrate antigen12-5; CA19-9, carbohydrate antigen 19-9; CEA, carcinoembryonic antigen; CRC, colorectal cancer; SMI, skeletal muscle index.

**Table S7.** The association between other SMI variability metrics and OS in CRC.

| Measurements/  SMI variability | Model A | | Model B | | Model C | |
| --- | --- | --- | --- | --- | --- | --- |
| HR (95% CI) | *P value* | HR (95% CI) | *P value* | HR (95% CI) | *P value* |
| **≥2 measurements** |  |  |  |  |  |  |
| SD | 1.06 (1.01-1.11) | 0.024 | 1.06 (1.01-1.11) | 0.027 | 1.08 (1.03-1.14) | 0.002 |
| CV | 1.02 (1.00-1.04) | 0.011 | 1.02 (1.00-1.04) | 0.013 | 1.03 (1.01-1.05) | 0.001 |
| MMD | 1.03 (1.00-1.05) | 0.040 | 1.03 (1.00-1.05) | 0.042 | 1.03 (1.01-1.06) | 0.010 |
| ARV | 1.04 (1.00-1.08) | 0.077 | 1.04 (0.99-1.08) | 0.088 | 1.05 (1.01-1.10) | 0.009 |
| RMSE | 1.00 (0.89-1.11) | 0.935 | 0.99 (0.89-1.11) | 0.920 | 1.00 (0.89-1.12) | 0.934 |
| **≥3 measurements** |  |  |  |  |  |  |
| SD | 1.04 (0.98-1.11) | 0.161 | 1.05 (0.98-1.11) | 0.158 | 1.07 (1.00-1.14) | 0.040 |
| CV | 1.03 (1.00-1.06) | 0.055 | 1.03 (1.00-1.06) | 0.052 | 1.04 (1.01-1.07) | 0.010 |
| MMD | 1.03 (1.00-1.06) | 0.058 | 1.03 (1.00-1.06) | 0.056 | 1.03 (1.00-1.06) | 0.037 |
| ARV | 1.01 (0.95-1.08) | 0.708 | 1.01 (0.95-1.08) | 0.718 | 1.03 (0.97-1.10) | 0.290 |
| RMSE | 1.04 (0.93-1.16) | 0.511 | 1.04 (0.93-1.17) | 0.522 | 1.04 (0.91-1.17) | 0.588 |
| **≥4 measurements** |  |  |  |  |  |  |
| SD | 1.06 (0.98-1.15) | 0.173 | 1.06 (0.97-1.15) | 0.180 | 1.08 (1.00-1.18) | 0.055 |
| CV | 1.03 (1.00-1.07) | 0.092 | 1.03 (0.99-1.07) | 0.104 | 1.04 (1.00-1.08) | 0.026 |
| MMD | 1.03 (0.99-1.06) | 0.120 | 1.03 (0.99-1.06) | 0.123 | 1.03 (1.00-1.07) | 0.065 |
| ARV | 1.04 (0.93-1.17) | 0.489 | 1.04 (0.93-1.17) | 0.508 | 1.09 (0.96-1.23) | 0.182 |
| RMSE | 1.01 (0.87-1.17) | 0.925 | 1.01 (0.86-1.17) | 0.948 | 1.03 (0.87-1.21) | 0.739 |

Note: BMI, body mass index; CA12-5, carbohydrate antigen12-5; CA19-9, carbohydrate antigen 19-9; CEA, carcinoembryonic antigen; CI, confidence interval; CRC, colorectal cancer; HR, hazard ratio; OS, overall survival; SMI, skeletal muscle index.

Model A: unadjusted.

Model B: adjusted for age, sex, BMI.

Model C: Model B + location, type, differentiation, stage, CEA, CA19-9, CA12-5, vascular invasion, chemotherapy, radiotherapy.

**Table S8.** The association between other SMI variability metrics and RFS in CRC.

| Measurements/  SMI variability | Model A | | | Model B | | | Model C | | |
| --- | --- | --- | --- | --- | --- | --- | --- | --- | --- |
| HR (95% CI) | *P value* | | HR (95% CI) | *P value* | | HR (95% CI) | | *P value* |
| **≥2 measurements** |  | |  |  | |  |  |  | |
| SD | 1.03 (0.99-1.08) | | 0.134 | 1.03 (0.99-1.08) | | 0.163 | 1.04 (0.99-1.09) | 0.082 | |
| CV | 1.01 (1.00-1.03) | | 0.099 | 1.01 (1.00-1.03) | | 0.083 | 1.02 (1.00-1.04) | 0.024 | |
| MMD | 1.02 (1.00-1.04) | | 0.045 | 1.02 (1.00-1.04) | | 0.062 | 1.02 (1.00-1.04) | 0.087 | |
| ARV | 1.02 (0.98-1.06) | | 0.390 | 1.02 (0.98-1.06) | | 0.443 | 1.02 (0.99-1.06) | 0.198 | |
| RMSE | 1.04 (0.96-1.12) | | 0.314 | 1.03 (0.96-1.12) | | 0.402 | 1.02 (0.94-1.10) | 0.662 | |
| **≥3 measurements** |  | |  |  | |  |  |  | |
| SD | 1.03 (0.98-1.08) | | 0.275 | 1.03 (0.98-1.08) | | 0.301 | 1.03 (0.98-1.09) | 0.230 | |
| CV | 1.02 (0.99-1.04) | | 0.132 | 1.02 (1.00-1.05) | | 0.118 | 1.02 (1.00-1.05) | 0.084 | |
| MMD | 1.02 (1.00-1.04) | | 0.073 | 1.02 (1.00-1.04) | | 0.083 | 1.02 (0.99-1.04) | 0.168 | |
| ARV | 1.01 (0.96-1.06) | | 0.749 | 1.01 (0.95-1.06) | | 0.819 | 1.02 (0.97-1.07) | 0.544 | |
| RMSE | 1.05 (0.96-1.14) | | 0.276 | 1.04 (0.96-1.14) | | 0.320 | 1.03 (0.94-1.12) | 0.586 | |
| **≥4 measurements** |  | |  |  | |  |  |  | |
| SD | 1.04 (0.97-1.11) | | 0.271 | 1.04 (0.97-1.11) | | 0.293 | 1.05 (0.98-1.13) | 0.185 | |
| CV | 1.02 (0.99-1.05) | | 0.165 | 1.02 (0.99-1.05) | | 0.166 | 1.03 (1.00-1.06) | 0.084 | |
| MMD | 1.02 (0.99-1.05) | | 0.181 | 1.02 (0.99-1.05) | | 0.199 | 1.02 (0.99-1.05) | 0.191 | |
| ARV | 1.04 (0.95-1.14) | | 0.362 | 1.04 (0.95-1.14) | | 0.403 | 1.07 (0.98-1.18) | 0.138 | |
| RMSE | 1.03 (0.92-1.15) | | 0.612 | 1.02 (0.92-1.14) | | 0.666 | 1.04 (0.93-1.17) | 0.478 | |

Note: BMI, body mass index; CA12-5, carbohydrate antigen12-5; CA19-9, carbohydrate antigen 19-9; CEA, carcinoembryonic antigen; CI, confidence interval; CRC, colorectal cancer; HR, hazard ratio; RFS; recurrence free survival; SMI, skeletal muscle index.

Model A: unadjusted.

Model B: adjusted for age, sex, BMI.

Model C: Model B + location, type, differentiation, stage, CEA, CA19-9, CA12-5, vascular invasion, chemotherapy, radiotherapy.

**Table S9.** Sensitivity analysis of the association between SMI trajectory groups and OS in CRC.

| Measurements/  SMI variability | Model A | | | Model B | | | Model C | | |
| --- | --- | --- | --- | --- | --- | --- | --- | --- | --- |
| HR (95% CI) | *P value* | | HR (95% CI) | *P value* | | HR (95% CI) | | *P value* |
| **≥2 measurements** |  | |  |  | |  |  |  | |
| Stable state | Reference | |  | Reference | |  | Reference |  | |
| Stable increasing | 1.10 (0.62-1.97) | | 0.743 | 1.07 (0.60-1.92) | | 0.824 | 1.26 (0.69-2.29) | 0.450 | |
| Declining fluctuations | 2.62 (1.63-4.19) | | <0.001 | 2.60 (1.62-4.18) | | <0.001 | 2.76 (1.69-4.49) | <0.001 | |
| **≥3 measurements** |  | |  |  | |  |  |  | |
| Stable state | Reference | |  | Reference | |  | Reference |  | |
| Stable increasing | 0.92 (0.47-1.80) | | 0.801 | 0.91 (0.46-1.79) | | 0.774 | 0.91 (0.45-1.81) | 0.780 | |
| Declining fluctuations | 2.92 (1.76-4.83) | | <0.001 | 2.92 (1.75-4.87) | | <0.001 | 2.91 (1.71-4.96) | <0.001 | |
| **≥4 measurements** |  | |  |  | |  |  |  | |
| Stable state | Reference | |  | Reference | |  | Reference |  | |
| Stable increasing | 0.94 (0.49-1.81) | | 0.862 | 0.93 (0.48-1.79) | | 0.828 | 1.00 (0.51-1.96) | 0.996 | |
| Declining fluctuations | 2.35 (1.29-4.28) | | 0.005 | 2.35 (1.28-4.33) | | 0.006 | 2.46 (1.31-4.64) | 0.005 | |

Note: BMI, body mass index; CA12-5, carbohydrate antigen12-5; CA19-9, carbohydrate antigen 19-9; CEA, carcinoembryonic antigen; CI, confidence interval; CRC, colorectal cancer; HR, hazard ratio; OS, overall survival; SMI, skeletal muscle index.

Model A: unadjusted.

Model B: adjusted for age, sex, BMI.

Model C: Model B + location, type, differentiation, stage, CEA, CA19-9, CA12-5, vascular invasion, chemotherapy, radiotherapy.

**Table S10.** Sensitivity analysis of the association between SMI trajectory groups and RFS in CRC.

| Measurements/  SMI variability | Model A | | | Model B | | | Model C | | |
| --- | --- | --- | --- | --- | --- | --- | --- | --- | --- |
| HR (95% CI) | | *P value* | HR (95% CI) | *P value* | | HR (95% CI) | | *P value* |
| **≥2 measurements** |  |  | |  | |  |  |  | |
| Stable state | Reference |  | | Reference | |  | Reference |  | |
| Stable increasing | 0.97 (0.60-1.58) | 0.910 | | 0.95 (0.58-1.56) | | 0.850 | 1.10 (0.67-1.82) | 0.698 | |
| Declining fluctuations | 1.99 (1.33-2.99) | 0.001 | | 1.94 (1.29-2.92) | | 0.002 | 2.00 (1.31-3.04) | 0.001 | |
| **≥3 measurements** |  |  | |  | |  |  |  | |
| Stable state | Reference |  | | Reference | |  | Reference |  | |
| Stable increasing | 0.82 (0.48-1.41) | 0.479 | | 0.81 (0.47-1.40) | | 0.449 | 0.83 (0.48-1.45) | 0.515 | |
| Declining fluctuations | 2.01 (1.30-3.12) | 0.002 | | 1.96 (1.26-3.06) | | 0.003 | 1.88 (1.20-2.97) | 0.006 | |
| **≥4 measurements** |  |  | |  | |  |  |  | |
| Stable state | Reference |  | | Reference | |  | Reference |  | |
| Stable increasing | 0.81 (0.48-1.38) | 0.442 | | 0.80 (0.47-1.36) | | 0.406 | 0.85 (0.50-1.47) | 0.565 | |
| Declining fluctuations | 1.80 (1.09-2.96) | 0.021 | | 1.77 (1.07-2.93) | | 0.027 | 1.77 (1.05-2.99) | 0.031 | |

Note: BMI, body mass index; CA12-5, carbohydrate antigen12-5; CA19-9, carbohydrate antigen 19-9; CEA, carcinoembryonic antigen; CI, confidence interval; CRC, colorectal cancer; HR, hazard ratio; RFS; recurrence free survival; SMI, skeletal muscle index.

Model A: unadjusted.

Model B: adjusted for age, sex, BMI.

Model C: Model B + location, type, differentiation, stage, CEA, CA19-9, CA12-5, vascular invasion, chemotherapy, radiotherapy.

**Table S11.** The association between SMI trajectory groups and OS in CRC among male.

| Measurements/  SMI variability | Model A | | | Model B | | | Model C | | |
| --- | --- | --- | --- | --- | --- | --- | --- | --- | --- |
| HR (95% CI) | *P value* | | HR (95% CI) | *P value* | | HR (95% CI) | | *P value* |
| **≥2 measurements** |  | |  |  | |  |  |  | |
| Stable state | Reference | |  | Reference | |  | Reference |  | |
| Stable increasing | 0.88 (0.43-1.80) | | 0.731 | 0.85 (0.41-1.74) | | 0.655 | 1.03 (0.50-2.16) | 0.927 | |
| Declining fluctuations | 3.04 (1.83-5.05) | | <0.001 | 3.32 (1.98-5.56) | | <0.001 | 3.25 (1.89-5.57) | <0.001 | |
| **≥3 measurements** |  | |  |  | |  |  |  | |
| Stable state | Reference | |  | Reference | |  | Reference |  | |
| Stable increasing | 0.75 (0.33-1.73) | | 0.502 | 0.72 (0.32-1.67) | | 0.448 | 0.71 (0.30-1.67) | 0.433 | |
| Declining fluctuations | 3.44 (2.01-5.91) | | <0.001 | 3.60 (2.09-6.20) | | <0.001 | 3.54 (1.98-6.31) | <0.001 | |
| **≥4 measurements** |  | |  |  | |  |  |  | |
| Stable state | Reference | |  | Reference | |  | Reference |  | |
| Stable increasing | 0.68 (0.29-1.57) | | 0.365 | 0.65 (0.28-1.51) | | 0.318 | 0.64 (0.27-1.53) | 0.313 | |
| Declining fluctuations | 2.35 (1.24-4.47) | | 0.009 | 2.43 (1.28-4.63) | | 0.007 | 2.34 (1.18-4.62) | 0.014 | |

Note: BMI, body mass index; CA12-5, carbohydrate antigen12-5; CA19-9, carbohydrate antigen 19-9; CEA, carcinoembryonic antigen; CI, confidence interval; CRC, colorectal cancer; HR, hazard ratio; OS, overall survival; SMI, skeletal muscle index.

Model A: unadjusted.

Model B: adjusted for age, BMI.

Model C: Model B + location, type, differentiation, stage, CEA, CA19-9, CA12-5, vascular invasion, chemotherapy, radiotherapy.

**Table S12.** The association between SMI trajectory groups and RFS in CRC among male.

| Measurements/  SMI variability | Model A | | Model B | | | Model C | | |
| --- | --- | --- | --- | --- | --- | --- | --- | --- |
| HR (95% CI) | *P value* | HR (95% CI) | *P value* | | HR (95% CI) | | *P value* |
| **≥2 measurements** |  |  |  | |  |  |  | |
| Stable state | Reference |  | Reference | |  | Reference |  | |
| Stable increasing | 0.84 (0.47-1.50) | 0.547 | 0.82 (0.46-1.48) | | 0.516 | 1.08 (0.59-1.97) | 0.807 | |
| Declining fluctuations | 2.30 (1.48-3.57) | <0.001 | 2.37 (1.52-3.71) | | <0.001 | 2.20 (1.39-3.50) | 0.001 | |
| **≥3 measurements** |  |  |  | |  |  |  | |
| Stable state | Reference |  | Reference | |  | Reference |  | |
| Stable increasing | 0.72 (0.38-1.37) | 0.313 | 0.70 (0.37-1.34) | | 0.286 | 0.78 (0.40-1.50) | 0.450 | |
| Declining fluctuations | 2.37 (1.49-3.75) | <0.001 | 2.38 (1.49-3.78) | | <0.001 | 2.20 (1.36-3.57) | 0.001 | |
| **≥4 measurements** |  |  |  | |  |  |  | |
| Stable state | Reference |  | Reference | |  | Reference |  | |
| Stable increasing | 0.73 (0.39-1.36) | 0.318 | 0.72 (0.38-1.33) | | 0.291 | 0.78 (0.41-1.47) | 0.438 | |
| Declining fluctuations | 1.87 (1.11-3.16) | 0.019 | 1.89 (1.12-3.20) | | 0.018 | 1.73 (1.00-3.01) | 0.051 | |

Note: BMI, body mass index; CA12-5, carbohydrate antigen12-5; CA19-9, carbohydrate antigen 19-9; CEA, carcinoembryonic antigen; CI, confidence interval; CRC, colorectal cancer; HR, hazard ratio; RFS; recurrence free survival; SMI, skeletal muscle index.

Model A: unadjusted.

Model B: adjusted for age, BMI.

Model C: Model B + location, type, differentiation, stage, CEA, CA19-9, CA12-5, vascular invasion, chemotherapy, radiotherapy.

**Table S13.** The association between SMI trajectory groups and OS in CRC among female.

| Measurements/  SMI variability | Model A | | | Model B | | | Model C | |
| --- | --- | --- | --- | --- | --- | --- | --- | --- |
| HR (95% CI) | *P value* | | HR (95% CI) | *P value* | | HR (95% CI) | *P value* |
| **≥2 measurements** |  | |  |  | |  |  |  |
| Stable state | Reference | |  | Reference | |  | Reference |  |
| Stable increasing | 1.87 (0.69-5.12) | | 0.220 | 1.90 (0.70-5.19) | | 0.210 | 2.27 (0.81-6.36) | 0.120 |
| Declining fluctuations | 1.62 (0.51-5.12) | | 0.415 | 1.69 (0.53-5.35) | | 0.374 | 1.99 (0.62-6.45) | 0.250 |
| **≥3 measurements** |  | |  |  | |  |  |  |
| Stable state | Reference | |  | Reference | |  | Reference |  |
| Stable increasing | 1.58 (0.49-5.05) | | 0.44 | 1.64 (0.51-5.25) | | 0.406 | 1.98 (0.59-6.66) | 0.269 |
| Declining fluctuations | 1.65 (0.40-6.78) | | 0.485 | 1.66 (0.40-6.80) | | 0.482 | 1.63 (0.38-7.08) | 0.513 |
| **≥4 measurements** |  | |  |  | |  |  |  |
| Stable state | Reference | |  | Reference | |  | Reference |  |
| Stable increasing | 2.00 (0.72-5.58) | | 0.187 | 1.96 (0.70-5.48) | | 0.201 | 2.57 (0.86-7.68) | 0.090 |
| Declining fluctuations | 1.75 (0.24-12.74) | | 0.579 | 1.84 (0.25-13.51) | | 0.547 | 2.86 (0.33-24.53) | 0.338 |

Note: BMI, body mass index; CA12-5, carbohydrate antigen12-5; CA19-9, carbohydrate antigen 19-9; CEA, carcinoembryonic antigen; CI, confidence interval; CRC, colorectal cancer; HR, hazard ratio; OS, overall survival; SMI, skeletal muscle index.

Model A: unadjusted.

Model B: adjusted for age, BMI.

Model C: Model B + location, type, differentiation, stage, CEA, CA19-9, CA12-5, vascular invasion, chemotherapy, radiotherapy.

**Table S14.** The association between SMI trajectory groups and RFS in CRC among female.

| Measurements/  SMI variability | Model A | | | Model B | | | Model C | | |
| --- | --- | --- | --- | --- | --- | --- | --- | --- | --- |
| HR (95% CI) | *P value* | | HR (95% CI) | *P value* | | HR (95% CI) | | *P value* |
| **≥2 measurements** |  | |  |  | |  |  |  | |
| Stable state | Reference | |  | Reference | |  | Reference |  | |
| Stable increasing | 1.38 (0.56-3.37) | | 0.482 | 1.38 (0.56-3.37) | | 0.48 | 1.42 (0.57-3.53) | 0.455 | |
| Declining fluctuations | 1.26 (0.47-3.42) | | 0.643 | 1.33 (0.49-3.60) | | 0.577 | 1.57 (0.57-4.32) | 0.382 | |
| **≥3 measurements** |  | |  |  | |  |  |  | |
| Stable state | Reference | |  | Reference | |  | Reference |  | |
| Stable increasing | 1.16 (0.43-3.17) | | 0.765 | 1.19 (0.44-3.23) | | 0.738 | 1.04 (0.37-2.92) | 0.941 | |
| Declining fluctuations | 0.96 (0.24-3.89) | | 0.952 | 0.96 (0.24-3.88) | | 0.950 | 0.87 (0.21-3.65) | 0.847 | |
| **≥4 measurements** |  | |  |  | |  |  |  | |
| Stable state | Reference | |  | Reference | |  | Reference |  | |
| Stable increasing | 1.07 (0.39-2.93) | | 0.894 | 1.05 (0.38-2.90) | | 0.918 | 0.99 (0.35-2.80) | 0.985 | |
| Declining fluctuations | 0.98 (0.14-7.03) | | 0.982 | 0.99 (0.14-7.12) | | 0.989 | 1.39 (0.18-10.92) | 0.752 | |

Note: BMI, body mass index; CA12-5, carbohydrate antigen12-5; CA19-9, carbohydrate antigen 19-9; CEA, carcinoembryonic antigen; CI, confidence interval; CRC, colorectal cancer; HR, hazard ratio; RFS; recurrence free survival; SMI, skeletal muscle index.

Model A: unadjusted.

Model B: adjusted for age, BMI.

Model C: Model B + location, type, differentiation, stage, CEA, CA19-9, CA12-5, vascular invasion, chemotherapy, radiotherapy.
